# Supplementary material for: Effect of paraquat-induced oxidative stress on gene expression and aging of the filamentous ascomycete Podospora anserina
Source: PubMed Central journal article supplement (PMC5349155; doi:10.15698/mic2014.07.155), 2014-06-22
Supplement: mic-01-225-s01.pdf [file mic-01-225-s01.pdf]

## Supplemental Data

**A**

| PaNo.      | gene          | juv PQ | ma PQ | sen PQ | aging | grisea |
|------------|---------------|--------|-------|--------|-------|--------|
| Pa_2_510   | <i>PaPks1</i> | 0.49   | 0.08  | 0.35   | 3.11  |        |
| Pa_5_11880 |               | 0.04   | 0.05  | 0.00   | 1.10  | 0.11   |
| Pa_7_11610 |               | 0.29   | 0.06  | 0.07   | 1.72  | 0.30   |
| Pa_5_1990  |               | 0.10   | 0.06  | 0.06   | 1.13  | 0.24   |

0.2 0 5

**B**

| PaNo.      | gene          | juv PQ | ma PQ | sen PQ | aging | grisea |
|------------|---------------|--------|-------|--------|-------|--------|
| Pa_1_15010 | <i>PaAl-1</i> | 6.15   | 1.33  | 4.30   | 0.88  | 1.33   |
| Pa_1_15240 | <i>PaAl-2</i> | 5.88   | 3.00  | 0.70   | 2.07  | 1.89   |
| Pa_2_610   | <i>PaAl-3</i> | 2.04   | 1.05  | 0.60   | 1.31  | 0.23   |

**C**

| PaNo.      | homolog              | e-value          | juv PQ | ma PQ | sen PQ | aging | grisea |
|------------|----------------------|------------------|--------|-------|--------|-------|--------|
| Pa_5_11970 | <i>ScFre1/ScFre2</i> | 9.0E-32, 8.0E-30 | 0.05   | 0.13  | 0.22   | 0.39  | 0.00   |
| Pa_7_5660  | <i>ScFre1/ScFre2</i> | 9.0E-29, 2.0E-28 | 0.42   | 1.52  | 0.40   | 0.85  | 0.68   |
| Pa_5_10230 | <i>ScFre1/ScFre2</i> | 1.0E-23, 3.0E-27 | 1.21   |       |        |       |        |
| Pa_1_19630 | <i>ScFre1/ScFre2</i> | 5.0E-22, 2.0E-23 | 1.54   | 0.50  | 0.85   | 2.06  | 0.44   |
| Pa_1_16410 | <i>ScFre1/ScFre2</i> | 2.0E-21, 1.0E-17 | 0.11   | 2.80  | 1.25   | 0.04  | 0.21   |
| Pa_1_19550 | <i>ScFre1/ScFre2</i> | 2.0E-16, 6.0E-12 | 1.95   | 0.81  | 1.46   | 0.48  | 2.57   |
| Pa_6_4210  | <i>ScFtr1</i>        | 2.00E-55         | 1.42   | 2.06  | 0.55   | 0.38  | 0.31   |
| Pa_6_4220  | <i>ScFet3</i>        | 1.00E-130        | 0.30   | 0.44  | 0.26   | 1.11  | 0.13   |
| Pa_2_530   | <i>ScFet3</i>        | 3.00E-78         | 0.42   | 0.22  | 0.09   | 7.40  | 0.08   |
| Pa_6_2550  | <i>ScFet3</i>        | 3.00E-56         | 0.12   | 0.10  | 0.28   | 1.01  | 1.01   |
| Pa_5_1200  | <i>ScFet3</i>        | 7.00E-47         | 4.40   | 1.98  | 15.64  | 0.43  | 0.55   |

**D**

| PaNo.      | homolog       | e-value | juv PQ | ma PQ | sen PQ | aging | grisea |
|------------|---------------|---------|--------|-------|--------|-------|--------|
| Pa_6_1720  | <i>AfSreA</i> | 2E-40   | 1.30   | 18.08 | 2.52   | 0.18  | 0.47   |
| Pa_4_4430  | <i>AfSidA</i> | 1E-119  | 3.26   | 2.99  | 4.12   | 0.64  | 2.49   |
| Pa_5_4760  | <i>AfSidF</i> | 1E-107  | 3.12   | 2.57  | 5.09   | 0.78  | 1.09   |
| Pa_3_11200 | <i>AfSidD</i> | 0.0     | 3.41   | 2.04  | 2.32   | 1.44  | 1.52   |
| Pa_4_4640  | <i>AfSidD</i> | 0.0     | 1.05   | 0.45  | 0.34   | 0.90  | 0.48   |
| Pa_5_1070  | <i>AfSidD</i> | 5E-92   | 0.87   | 0.52  | 1.62   | 0.99  | 0.85   |
| Pa_4_4440  | <i>AfSidC</i> | 0.0     | 1.66   | 2.11  | 1.84   | 1.25  | 3.06   |
| Pa_4_4640  | <i>AfSidC</i> | 1E-121  | 1.05   | 0.45  | 0.34   | 0.90  | 0.48   |
| Pa_2_7870  | <i>AfSidC</i> | 1E-119  | 0.14   | 0.01  | 0.11   | 0.92  | 0.02   |
| Pa_7_120   | <i>AfMirB</i> | 6E-88   | 4.14   | 4.95  | 4.04   | 0.44  | 2.34   |
| Pa_5_3540  | <i>AfMirB</i> | 1E-117  | 2.26   | 1.70  | 1.02   | 0.90  | 0.73   |
| Pa_5_4490  | <i>AfSit1</i> | 0.0     | 1.92   | 3.54  | 0.65   | 1.69  | 0.78   |
| Pa_7_6950  | <i>AfMirC</i> | 1E-151  | 1.96   | 4.74  | 2.48   | 0.20  | 1.60   |
| Pa_3_1250  | <i>AfEstB</i> | 2E-38   | 1.06   | 0.99  | 0.86   | 0.95  | 10.93  |
| Pa_2_8330  | <i>AfEstB</i> | 1E-37   | 1.18   | 4.96  | 0.29   | 0.91  | 0.39   |
| Pa_4_1300  | <i>AfEstB</i> | 8E-30   | 0.39   | 0.12  | 0.24   | 2.58  | 1.22   |

**Supplemental Figure 1: Transcriptome data of transcripts associated with (A) melanin synthesis, (B) carotenoid synthesis, (C) reductive iron assimilation and (D) siderophore mediated iron uptake.** Relative expression was calculated by dividing tpm of juvenile PQ-stressed samples by tpm of juvenile control (juv PQ), middle-aged PQ-stressed samples by middle-aged control (ma PQ), senescent PQ-stressed samples by senescent control (sen PQ), senescent control by juvenile control (aging) and of grisea by wild-type control (grisea).

**Supplemental Table 1: GO enrichment analysis of transcriptome data PQ-stressed senescent wild-type cultures of *P. anserina*.**

| up-regulated |            |            |          |                                     |                                                                        |                                                        |
|--------------|------------|------------|----------|-------------------------------------|------------------------------------------------------------------------|--------------------------------------------------------|
|              | GO ID      | p-value    | C        | S                                   | Description                                                            |                                                        |
| CC           | GO:0044429 | 1.73E-10   | 118      | 581                                 | mitochondrial part                                                     |                                                        |
|              | GO:0005740 | 1.22E-07   | 83       | 408                                 | mitochondrial envelope                                                 |                                                        |
|              | GO:0005743 | 1.31E-06   | 57       | 261                                 | mitochondrial inner membrane                                           |                                                        |
|              | GO:0019866 | 3.61E-06   | 57       | 269                                 | organelle inner membrane                                               |                                                        |
|              | GO:0005739 | 4.14E-06   | 176      | 1121                                | mitochondrion                                                          |                                                        |
|              | GO:0005759 | 7.53E-06   | 47       | 212                                 | mitochondrial matrix                                                   |                                                        |
|              | GO:0044455 | 9.33E-06   | 38       | 159                                 | mitochondrial membrane part                                            |                                                        |
|              | GO:0031966 | 1.26E-05   | 73       | 386                                 | mitochondrial membrane                                                 |                                                        |
|              | GO:0031975 | 1.52E-04   | 101      | 617                                 | envelope                                                               |                                                        |
|              | GO:0031967 | 1.93E-04   | 96       | 584                                 | organelle envelope                                                     |                                                        |
|              | GO:0005758 | 1.48E-03   | 12       | 40                                  | mitochondrial intermembrane space                                      |                                                        |
|              | GO:0000313 | 1.52E-03   | 11       | 35                                  | organellar ribosome                                                    |                                                        |
|              | GO:0005761 | 1.52E-03   | 11       | 35                                  | mitochondrial ribosome                                                 |                                                        |
|              | GO:0045275 | 1.81E-03   | 5        | 9                                   | respiratory chain complex III                                          |                                                        |
|              | GO:0005750 | 1.81E-03   | 5        | 9                                   | mitochondrial respiratory chain complex III                            |                                                        |
|              | GO:0005744 | 2.07E-03   | 6        | 13                                  | mitochondrial inner membrane presequence translocase complex           |                                                        |
|              | GO:0044420 | 2.29E-03   | 4        | 6                                   | extracellular matrix part                                              |                                                        |
|              | GO:0005581 | 2.29E-03   | 4        | 6                                   | collagen                                                               |                                                        |
|              | GO:0031970 | 2.38E-03   | 14       | 53                                  | organelle envelope lumen                                               |                                                        |
|              | GO:0000314 | 3.27E-03   | 6        | 14                                  | organellar small ribosomal subunit                                     |                                                        |
|              | GO:0005763 | 3.27E-03   | 6        | 14                                  | mitochondrial small ribosomal subunit                                  |                                                        |
|              | GO:0005578 | 3.27E-03   | 5        | 10                                  | proteinaceous extracellular matrix                                     |                                                        |
|              | GO:0016021 | 3.76E-03   | 241      | 1796                                | integral to membrane                                                   |                                                        |
|              | GO:0030015 | 4.84E-03   | 4        | 7                                   | CCR4-NOT core complex                                                  |                                                        |
|              | GO:0031304 | 7.11E-03   | 6        | 16                                  | intrinsic to mitochondrial inner membrane                              |                                                        |
|              | GO:0031305 | 8.42E-03   | 5        | 12                                  | integral to mitochondrial inner membrane                               |                                                        |
|              | BP         | GO:0007005 | 2.65E-07 | 56                                  | 243                                                                    | mitochondrion organization                             |
|              |            | GO:0070585 | 2.29E-05 | 19                                  | 59                                                                     | protein localization to mitochondrion                  |
|              |            | GO:0072655 | 2.29E-05 | 19                                  | 59                                                                     | establishment of protein localization to mitochondrion |
|              |            | GO:0006839 | 2.67E-05 | 29                                  | 113                                                                    | mitochondrial transport                                |
|              |            | GO:0006626 | 5.03E-05 | 18                                  | 57                                                                     | protein targeting to mitochondrion                     |
| GO:0030026   |            | 2.65E-04   | 7        | 13                                  | cellular manganese ion homeostasis                                     |                                                        |
| GO:0055071   |            | 2.65E-04   | 7        | 13                                  | manganese ion homeostasis                                              |                                                        |
| GO:0006783   |            | 4.72E-04   | 9        | 22                                  | heme biosynthetic process                                              |                                                        |
| GO:0006779   |            | 4.83E-04   | 11       | 31                                  | porphyrin-containing compound biosynthetic process                     |                                                        |
| GO:0006778   |            | 6.59E-04   | 11       | 32                                  | porphyrin-containing compound metabolic process                        |                                                        |
| GO:0042168   |            | 6.96E-04   | 9        | 23                                  | heme metabolic process                                                 |                                                        |
| GO:0006627   |            | 8.43E-04   | 4        | 5                                   | protein processing involved in protein targeting to mitochondrion      |                                                        |
| GO:0055114   |            | 8.53E-04   | 66       | 388                                 | oxidation-reduction process                                            |                                                        |
| GO:0033014   |            | 1.53E-03   | 11       | 35                                  | tetrapyrrole biosynthetic process                                      |                                                        |
| GO:0045333   |            | 1.72E-03   | 40       | 215                                 | cellular respiration                                                   |                                                        |
| GO:0033013   |            | 1.98E-03   | 11       | 36                                  | tetrapyrrole metabolic process                                         |                                                        |
| GO:0055085   |            | 2.20E-03   | 111      | 740                                 | transmembrane transport                                                |                                                        |
| GO:0030150   |            | 2.90E-03   | 7        | 18                                  | protein import into mitochondrial matrix                               |                                                        |
| GO:0000002   |            | 2.95E-03   | 12       | 43                                  | mitochondrial genome maintenance                                       |                                                        |
| GO:0000963   |            | 3.29E-03   | 5        | 10                                  | mitochondrial RNA processing                                           |                                                        |
| GO:0032543   |            | 4.30E-03   | 15       | 62                                  | mitochondrial translation                                              |                                                        |
| GO:0046148   |            | 4.30E-03   | 15       | 62                                  | pigment biosynthetic process                                           |                                                        |
| GO:0010508   |            | 4.47E-03   | 8        | 24                                  | positive regulation of autophagy                                       |                                                        |
| GO:0007006   |            | 4.47E-03   | 9        | 29                                  | mitochondrial membrane organization                                    |                                                        |
| GO:0006673   |            | 4.86E-03   | 4        | 7                                   | inositolphosphoceramide metabolic process                              |                                                        |
| GO:0006675   |            | 4.86E-03   | 4        | 7                                   | mannosyl-inositol phosphorylceramide metabolic process                 |                                                        |
| GO:0017038   |            | 5.50E-03   | 24       | 120                                 | protein import                                                         |                                                        |
| GO:0006091   |            | 5.58E-03   | 56       | 344                                 | generation of precursor metabolites and energy                         |                                                        |
| GO:0042180   |            | 6.75E-03   | 113      | 781                                 | cellular ketone metabolic process                                      |                                                        |
| GO:0015980   |            | 7.19E-03   | 44       | 261                                 | energy derivation by oxidation of organic compounds                    |                                                        |
| GO:0046364   | 7.75E-03   | 12         | 48       | monosaccharide biosynthetic process |                                                                        |                                                        |
| GO:0009060   | 8.04E-03   | 23         | 117      | aerobic respiration                 |                                                                        |                                                        |
| GO:0000050   | 8.83E-03   | 4          | 8        | urea cycle                          |                                                                        |                                                        |
| GO:0006094   | 8.85E-03   | 11         | 43       | gluconeogenesis                     |                                                                        |                                                        |
| GO:0051188   | 9.36E-03   | 29         | 159      | cofactor biosynthetic process       |                                                                        |                                                        |
| GO:0010506   | 9.83E-03   | 8          | 27       | regulation of autophagy             |                                                                        |                                                        |
| MF           | GO:0016679 | 2.47E-04   | 14       | 42                                  | oxidoreductase activity, acting on diphenols and related substances... |                                                        |

|            |          |     |      |                                                                             |
|------------|----------|-----|------|-----------------------------------------------------------------------------|
| GO:0015450 | 3.88E-04 | 9   | 21   | P-P-bond-hydrolysis-driven protein transmembrane transporter activity       |
| GO:0045551 | 4.09E-04 | 6   | 10   | cinnamyl-alcohol dehydrogenase activity                                     |
| GO:0008320 | 8.64E-04 | 9   | 23   | protein transmembrane transporter activity                                  |
| GO:0022884 | 8.64E-04 | 9   | 23   | macromolecule transmembrane transporter activity                            |
| GO:0003824 | 1.38E-03 | 705 | 5566 | catalytic activity                                                          |
| GO:0004605 | 1.74E-03 | 3   | 3    | phosphatidate cytidyltransferase activity                                   |
| GO:0016783 | 2.07E-03 | 5   | 9    | sulfurtransferase activity                                                  |
| GO:0008121 | 2.42E-03 | 6   | 13   | ubiquinol-cytochrome-c reductase activity                                   |
| GO:0016681 | 2.42E-03 | 6   | 13   | oxidoreductase activity, acting on diphenols and related substances as...   |
| GO:0016746 | 2.54E-03 | 60  | 350  | transferase activity, transferring acyl groups                              |
| GO:0016747 | 5.00E-03 | 51  | 297  | transferase activity, transferring acyl groups other than amino-acyl groups |
| GO:0016491 | 5.51E-03 | 263 | 1920 | oxidoreductase activity                                                     |
| GO:0016782 | 5.72E-03 | 6   | 15   | transferase activity, transferring sulfur-containing groups                 |
| GO:0043115 | 6.33E-03 | 3   | 4    | precorrin-2 dehydrogenase activity                                          |
| GO:0004325 | 6.33E-03 | 3   | 4    | ferrochelatase activity                                                     |
| GO:0016410 | 6.81E-03 | 25  | 125  | N-acyltransferase activity                                                  |
| GO:0008080 | 9.22E-03 | 23  | 115  | N-acetyltransferase activity                                                |
| GO:0004479 | 9.56E-03 | 5   | 12   | methionyl-tRNA formyltransferase activity                                   |

#### down-regulated

|    | GO ID      | p-value  | C    | S    | Description                                                                    |
|----|------------|----------|------|------|--------------------------------------------------------------------------------|
| BP | GO:0006260 | 5.57E-04 | 69   | 275  | DNA replication                                                                |
|    | GO:0006083 | 1.61E-03 | 8    | 15   | acetate metabolic process                                                      |
|    | GO:0030989 | 3.87E-03 | 4    | 5    | dynein-driven meiotic oscillatory nuclear movement                             |
|    | GO:0051691 | 4.40E-03 | 8    | 17   | cellular oligosaccharide metabolic process                                     |
|    | GO:0019236 | 4.67E-03 | 29   | 104  | response to pheromone                                                          |
|    | GO:0043406 | 5.19E-03 | 3    | 3    | positive regulation of MAP kinase activity                                     |
|    | GO:0000169 | 5.19E-03 | 3    | 3    | activation of MAPK activity involved in osmosensory signaling pathway          |
|    | GO:0000187 | 5.19E-03 | 3    | 3    | activation of MAPK activity                                                    |
|    | GO:0000189 | 5.19E-03 | 3    | 3    | MAPK import into nucleus                                                       |
|    | GO:0000208 | 5.19E-03 | 3    | 3    | MAPK import into nucleus involved in osmosensory signaling pathway             |
|    | GO:0032005 | 5.20E-03 | 12   | 32   | signal transduction involved in conjugation with cellular fusion               |
|    | GO:0007124 | 5.47E-03 | 25   | 87   | pseudohyphal growth                                                            |
|    | GO:0010033 | 5.86E-03 | 45   | 181  | response to organic substance                                                  |
|    | GO:0032787 | 6.57E-03 | 56   | 236  | monocarboxylic acid metabolic process                                          |
|    | GO:0019748 | 6.77E-03 | 15   | 45   | secondary metabolic process                                                    |
|    | GO:0036267 | 9.50E-03 | 22   | 77   | invasive filamentous growth                                                    |
|    | GO:0001403 | 9.50E-03 | 22   | 77   | invasive growth in response to glucose limitation                              |
| MF | GO:0004497 | 1.65E-06 | 85   | 298  | monoxygenase activity                                                          |
|    | GO:0004339 | 1.40E-04 | 9    | 14   | glucan 1,4-alpha-glucosidase activity                                          |
|    | GO:0016712 | 2.03E-04 | 19   | 47   | oxidoreductase activity, acting on paired donors, with incorporation...        |
|    | GO:0016709 | 5.32E-04 | 35   | 115  | oxidoreductase activity, acting on paired donors, with incorporation...        |
|    | GO:0008470 | 8.79E-04 | 5    | 6    | isovaleryl-CoA dehydrogenase activity                                          |
|    | GO:0005337 | 9.04E-04 | 7    | 11   | nucleoside transmembrane transporter activity                                  |
|    | GO:0050839 | 9.04E-04 | 7    | 11   | cell adhesion molecule binding                                                 |
|    | GO:0070330 | 9.06E-04 | 15   | 37   | aromatase activity                                                             |
|    | GO:0004312 | 9.60E-04 | 21   | 60   | fatty acid synthase activity                                                   |
|    | GO:0004085 | 9.74E-04 | 4    | 4    | butyryl-CoA dehydrogenase activity                                             |
|    | GO:0052890 | 9.74E-04 | 4    | 4    | oxidoreductase activity, acting on the CH-CH group of donors, with a flavin... |
|    | GO:0018664 | 1.13E-03 | 12   | 27   | benzoate 4-monooxygenase activity                                              |
|    | GO:0004316 | 1.36E-03 | 13   | 31   | 3-oxoacyl-[acyl-carrier-protein] reductase (NADPH) activity                    |
|    | GO:0016872 | 1.84E-03 | 7    | 12   | intramolecular lyase activity                                                  |
|    | GO:0016491 | 2.30E-03 | 381  | 1920 | oxidoreductase activity                                                        |
|    | GO:0016229 | 4.03E-03 | 16   | 46   | steroid dehydrogenase activity                                                 |
|    | GO:0004474 | 4.18E-03 | 4    | 5    | malate synthase activity                                                       |
|    | GO:0005488 | 4.87E-03 | 1066 | 5839 | binding                                                                        |
|    | GO:0016627 | 4.90E-03 | 44   | 171  | oxidoreductase activity, acting on the CH-CH group of donors                   |
|    | GO:0016705 | 5.33E-03 | 99   | 442  | oxidoreductase activity, acting on paired donors, with incorporation...        |
|    | GO:0004708 | 5.52E-03 | 3    | 3    | MAP kinase kinase activity                                                     |
|    | GO:0047616 | 5.52E-03 | 3    | 3    | acyl-CoA dehydrogenase (NADP+) activity                                        |
|    | GO:0015926 | 5.68E-03 | 20   | 64   | glucosidase activity                                                           |
|    | GO:0016405 | 5.74E-03 | 7    | 14   | CoA-ligase activity                                                            |
|    | GO:0033764 | 6.53E-03 | 15   | 44   | steroid dehydrogenase activity, acting on the CH-OH group of donors...         |
|    | GO:0003995 | 8.05E-03 | 16   | 49   | acyl-CoA dehydrogenase activity                                                |

All transcripts with differential expression (Factor < 3; pV < 0.01) in senescent PQ-stressed samples were analyzed. Entries high-lighted in red refer to terms discussed in the text. GO terms with pV < 1E-3 are shown. The GO terms referred to in the text are high-lighted in red. CC: Cellular Component; BP: Biological Process; C: Count (number of genes of respective GO term in the group (up- or down-regulated)); S: Size (total number of *P. anserina* genes with the respective GO term).

**Supplemental table 2: Summary of primer sequences used for qRT-PCR.**

| PaNo.             | gene           | Primer              | sequence             |
|-------------------|----------------|---------------------|----------------------|
| <i>Pa_1_16400</i> | <i>PaCtr1</i>  | <i>Pa_1_16400-1</i> | CTCACAATGTCACACTCC   |
|                   |                | <i>Pa_1_16400-2</i> | TTAGCGATCAGTGCTACC   |
| <i>Pa_2_4660</i>  | <i>PaSod2</i>  | <i>PaSod2-1</i>     | TGGCTGCTGTTGAGAAGACC |
|                   |                | <i>PaSod2-2</i>     | TCGGCCGTCTCCAGTTGAT  |
| <i>Pa_2_9780</i>  | <i>PaPorin</i> | <i>Porin-RT-for</i> | TCTCCTCCGGCAGCCTTG   |
|                   |                | <i>Porin-RT-rev</i> | GAGGGTGTGCGCAAGTTC   |
| <i>Pa_3_1710</i>  | <i>PaAox</i>   | <i>PaAox1-1</i>     | CGCTGACAGAAGCTCAAT   |
|                   |                | <i>PaAox1-2</i>     | ATTCGTGGCGAGATCAAG   |
| <i>Pa_3_10440</i> | <i>PaCtr3</i>  | <i>PaCtr3-1</i>     | GCGGATGTACTACAATGG   |
|                   |                | <i>PaCtr3-2</i>     | CCGTCGTCGTAATACTTC   |
| <i>Pa_4_650</i>   | <i>PaRpl19</i> | <i>PaRpl19-1</i>    | AGATCTCCAACGCCAACTCC |
|                   |                | <i>PaRpl19-2</i>    | TCGTGGTAGAGGTGCTTGTC |
| <i>Pa_4_4770</i>  | <i>PaCtr2</i>  | <i>Pa_4_4770-1</i>  | CTGACGAGCACATACATGG  |
|                   |                | <i>Pa_4_4770-2</i>  | CGACGTTCATCGTCATCAC  |
